# Supplementary material
Source: Elsevier journal article supplement (https://comptes-rendus.academie-sciences.fr/chimie/article/10.1016/j.crci.2015.09.010/file/attach/mmc1.pdf)
Supplement: mmc1 [file mmc1.pdf]

**Table S1.** Results obtained for the training set and prediction set.

| No. | Ionic liquid                                                    | $T$ (K) | $P$ (kPa) | $M$    | $(T,P)^{exp}$ ( $W \cdot m^{-1}K^{-1}$ ) | $(T,P)^{calc}$ ( $W \cdot m^{-1}K^{-1}$ ) | %    | Ref. |
|-----|-----------------------------------------------------------------|---------|-----------|--------|------------------------------------------|-------------------------------------------|------|------|
|     | Training set                                                    |         |           |        |                                          |                                           |      |      |
| 1   | 1-ethyl-3-methylimidazolium tetrafluoroborate                   | 300.00  | 101.325   | 152.87 | 0.1990                                   | 0.1991                                    | 0.04 | [24] |
| 2   |                                                                 | 310.00  | 101.325   | 152.87 | 0.1970                                   | 0.1977                                    | 0.35 |      |
| 3   |                                                                 | 320.00  | 101.325   | 152.87 | 0.1960                                   | 0.1963                                    | 0.13 |      |
| 4   |                                                                 | 330.00  | 101.325   | 152.87 | 0.1950                                   | 0.1948                                    | 0.10 |      |
| 5   |                                                                 | 340.00  | 101.325   | 152.87 | 0.1940                                   | 0.1934                                    | 0.31 |      |
| 6   |                                                                 | 350.00  | 101.325   | 152.87 | 0.1930                                   | 0.1921                                    | 0.48 |      |
| 7   |                                                                 | 360.00  | 101.325   | 152.87 | 0.1910                                   | 0.1909                                    | 0.05 |      |
| 8   |                                                                 | 370.00  | 101.325   | 152.87 | 0.1900                                   | 0.1900                                    | 0.03 |      |
| 9   |                                                                 | 380.00  | 101.325   | 152.87 | 0.1890                                   | 0.1893                                    | 0.13 |      |
| 10  |                                                                 | 390.00  | 101.325   | 152.87 | 0.1880                                   | 0.1888                                    | 0.45 |      |
| 11  | 1-butyl-3-methylimidazolium tetrafluoroborate                   | 300.00  | 101.325   | 152.87 | 0.1860                                   | 0.1866                                    | 0.34 | [24] |
| 12  |                                                                 | 310.00  | 101.325   | 152.87 | 0.1850                                   | 0.1859                                    | 0.46 |      |
| 13  |                                                                 | 320.00  | 101.325   | 152.87 | 0.1840                                   | 0.1850                                    | 0.54 |      |
| 14  |                                                                 | 330.00  | 101.325   | 152.87 | 0.1840                                   | 0.1841                                    | 0.04 |      |
| 15  |                                                                 | 340.00  | 101.325   | 152.87 | 0.1830                                   | 0.1831                                    | 0.05 |      |
| 16  |                                                                 | 350.00  | 101.325   | 152.87 | 0.1830                                   | 0.1822                                    | 0.46 |      |
| 17  |                                                                 | 360.00  | 101.325   | 152.87 | 0.1820                                   | 0.1813                                    | 0.38 |      |
| 18  |                                                                 | 370.00  | 101.325   | 152.87 | 0.1810                                   | 0.1806                                    | 0.23 |      |
| 19  |                                                                 | 380.00  | 101.325   | 152.87 | 0.1810                                   | 0.1801                                    | 0.50 |      |
| 20  |                                                                 | 390.00  | 101.325   | 152.87 | 0.1800                                   | 0.1799                                    | 0.08 |      |
| 21  | 1-hexyl-3-methylimidazolium bis[(trifluoromethyl)sulfonyl]imide | 273.15  | 101.325   | 346.21 | 0.1238                                   | 0.1229                                    | 0.69 | [6]  |
| 22  |                                                                 | 283.15  | 101.325   | 346.21 | 0.1224                                   | 0.1227                                    | 0.23 |      |
| 23  |                                                                 | 293.15  | 101.325   | 346.21 | 0.1219                                   | 0.1225                                    | 0.48 |      |
| 24  |                                                                 | 303.15  | 101.325   | 346.21 | 0.1237                                   | 0.1223                                    | 1.11 |      |
| 25  |                                                                 | 313.15  | 101.325   | 346.21 | 0.1220                                   | 0.1222                                    | 0.18 |      |
| 26  |                                                                 | 323.15  | 101.325   | 346.21 | 0.1201                                   | 0.1221                                    | 1.69 |      |
| 27  |                                                                 | 333.15  | 101.325   | 346.21 | 0.1208                                   | 0.1221                                    | 1.04 |      |
| 28  |                                                                 | 343.15  | 101.325   | 346.21 | 0.1212                                   | 0.1220                                    | 0.67 |      |
| 29  |                                                                 | 353.15  | 101.325   | 346.21 | 0.1209                                   | 0.1220                                    | 0.89 |      |
| 30  | 1-hexyl-3-methylimidazolium bis[(trifluoromethyl)sulfonyl]imide | 293.00  | 101.325   | 346.21 | 0.1270                                   | 0.1225                                    | 3.55 | [20] |
| 31  |                                                                 | 303.00  | 101.325   | 346.21 | 0.1270                                   | 0.1223                                    | 3.68 |      |
| 32  |                                                                 | 313.00  | 101.325   | 346.21 | 0.1270                                   | 0.1222                                    | 3.76 |      |
| 33  |                                                                 | 323.00  | 101.325   | 346.21 | 0.1260                                   | 0.1221                                    | 3.07 |      |

|    |                                                                 |        |         |        |        |        |      |      |
|----|-----------------------------------------------------------------|--------|---------|--------|--------|--------|------|------|
| 34 |                                                                 | 333.00 | 101.325 | 346.21 | 0.1250 | 0.1221 | 2.35 |      |
| 35 |                                                                 | 343.00 | 101.325 | 346.21 | 0.1250 | 0.1220 | 2.38 |      |
| 36 |                                                                 | 353.00 | 101.325 | 346.21 | 0.1250 | 0.1220 | 2.42 |      |
| 37 | 1,3-dibutyl-1H-imidazolium bis((trifluoromethyl)sulfonyl)amide  | 273.15 | 101.325 | 346.21 | 0.1209 | 0.1229 | 1.69 | [6]  |
| 38 |                                                                 | 283.15 | 101.325 | 346.21 | 0.1203 | 0.1226 | 1.95 |      |
| 39 |                                                                 | 293.15 | 101.325 | 346.21 | 0.1188 | 0.1224 | 3.05 |      |
| 40 |                                                                 | 303.15 | 101.325 | 346.21 | 0.1198 | 0.1222 | 2.04 |      |
| 41 |                                                                 | 313.15 | 101.325 | 346.21 | 0.1176 | 0.1221 | 3.84 |      |
| 42 |                                                                 | 323.15 | 101.325 | 346.21 | 0.1170 | 0.1220 | 4.27 |      |
| 43 |                                                                 | 333.15 | 101.325 | 346.21 | 0.1176 | 0.1219 | 3.67 |      |
| 44 |                                                                 | 343.15 | 101.325 | 346.21 | 0.1171 | 0.1219 | 4.06 |      |
| 45 |                                                                 | 353.15 | 101.325 | 346.21 | 0.1164 | 0.1218 | 4.66 |      |
| 46 | 1-ethyl-3-methylimidazolium bis[(trifluoromethyl)sulfonyl]imide | 273.15 | 101.325 | 346.21 | 0.1208 | 0.1248 | 3.30 | [6]  |
| 47 |                                                                 | 283.15 | 101.325 | 346.21 | 0.1206 | 0.1247 | 3.37 |      |
| 48 |                                                                 | 293.15 | 101.325 | 346.21 | 0.1202 | 0.1246 | 3.63 |      |
| 49 |                                                                 | 303.15 | 101.325 | 346.21 | 0.1215 | 0.1245 | 2.46 |      |
| 50 |                                                                 | 313.15 | 101.325 | 346.21 | 0.1195 | 0.1245 | 4.14 |      |
| 51 |                                                                 | 323.15 | 101.325 | 346.21 | 0.1184 | 0.1244 | 4.96 |      |
| 52 |                                                                 | 333.15 | 101.325 | 346.21 | 0.1190 | 0.1244 | 4.56 |      |
| 53 |                                                                 | 343.15 | 101.325 | 346.21 | 0.1194 | 0.1244 | 4.21 |      |
| 54 |                                                                 | 353.15 | 101.325 | 346.21 | 0.1191 | 0.1245 | 4.49 |      |
| 55 | 1-ethyl-3-methylimidazolium bis[(trifluoromethyl)sulfonyl]imide | 293.00 | 101.325 | 346.21 | 0.1300 | 0.1246 | 4.18 | [20] |
| 56 |                                                                 | 303.00 | 101.325 | 346.21 | 0.1300 | 0.1245 | 4.24 |      |
| 57 |                                                                 | 313.00 | 101.325 | 346.21 | 0.1290 | 0.1245 | 3.53 |      |
| 58 |                                                                 | 323.00 | 101.325 | 346.21 | 0.1290 | 0.1244 | 3.54 |      |
| 59 |                                                                 | 333.00 | 101.325 | 346.21 | 0.1290 | 0.1244 | 3.54 |      |
| 60 |                                                                 | 343.00 | 101.325 | 346.21 | 0.1290 | 0.1244 | 3.54 |      |
| 61 |                                                                 | 353.00 | 101.325 | 346.21 | 0.1280 | 0.1245 | 2.77 |      |
| 62 | 1-ethyl-3-methylimidazolium acetate                             | 273.15 | 101.325 | 125.11 | 0.2137 | 0.2141 | 0.18 | [6]  |
| 63 |                                                                 | 283.15 | 101.325 | 125.11 | 0.2124 | 0.2127 | 0.14 |      |
| 64 |                                                                 | 293.15 | 101.325 | 125.11 | 0.2110 | 0.2110 | 0.00 |      |
| 65 |                                                                 | 303.15 | 101.325 | 125.11 | 0.2102 | 0.2089 | 0.60 |      |
| 66 |                                                                 | 313.15 | 101.325 | 125.11 | 0.2066 | 0.2065 | 0.05 |      |
| 67 |                                                                 | 323.15 | 101.325 | 125.11 | 0.2026 | 0.2036 | 0.50 |      |
| 68 |                                                                 | 333.15 | 101.325 | 125.11 | 0.2002 | 0.2003 | 0.03 |      |
| 69 |                                                                 | 343.15 | 101.325 | 125.11 | 0.1973 | 0.1964 | 0.45 |      |
| 70 |                                                                 | 353.15 | 101.325 | 125.11 | 0.1915 | 0.1921 | 0.29 |      |

|     |                                                       |        |         |        |        |        |      |      |
|-----|-------------------------------------------------------|--------|---------|--------|--------|--------|------|------|
| 71  | 1-ethyl-3-methylimidazolium ethyl sulfate             | 273.15 | 101.325 | 191.19 | 0.1876 | 0.1877 | 0.03 | [6]  |
| 72  |                                                       | 283.15 | 101.325 | 191.19 | 0.1882 | 0.1862 | 1.04 |      |
| 73  |                                                       | 293.15 | 101.325 | 191.19 | 0.1856 | 0.1850 | 0.30 |      |
| 74  |                                                       | 303.15 | 101.325 | 191.19 | 0.1872 | 0.1840 | 1.69 |      |
| 75  |                                                       | 313.15 | 101.325 | 191.19 | 0.1840 | 0.1832 | 0.43 |      |
| 76  |                                                       | 323.15 | 101.325 | 191.19 | 0.1833 | 0.1825 | 0.43 |      |
| 77  |                                                       | 333.15 | 101.325 | 191.19 | 0.1832 | 0.1820 | 0.68 |      |
| 78  |                                                       | 343.15 | 101.325 | 191.19 | 0.1834 | 0.1815 | 1.03 |      |
| 79  |                                                       | 353.15 | 101.325 | 191.19 | 0.1830 | 0.1812 | 0.99 |      |
| 80  | 1-ethyl-3-methylimidazolium ethyl sulfate             | 283.11 | 101.325 | 191.19 | 0.1850 | 0.1862 | 0.67 | [17] |
| 81  |                                                       | 293.16 | 101.325 | 191.19 | 0.1860 | 0.1850 | 0.52 |      |
| 82  |                                                       | 303.16 | 101.325 | 191.19 | 0.1850 | 0.1840 | 0.52 |      |
| 83  |                                                       | 313.04 | 101.325 | 191.19 | 0.1850 | 0.1832 | 0.97 |      |
| 84  |                                                       | 323.02 | 101.325 | 191.19 | 0.1840 | 0.1825 | 0.80 |      |
| 85  |                                                       | 332.91 | 101.325 | 191.19 | 0.1840 | 0.1820 | 1.11 |      |
| 86  |                                                       | 342.89 | 101.325 | 191.19 | 0.1840 | 0.1815 | 1.35 |      |
| 87  |                                                       | 352.82 | 101.325 | 191.19 | 0.1830 | 0.1812 | 0.99 |      |
| 88  | 1-ethyl-3-methylimidazolium ethyl sulfate             | 293.00 | 101.325 | 191.19 | 0.1820 | 0.1851 | 1.68 | [17] |
| 89  |                                                       | 303.00 | 101.325 | 191.19 | 0.1810 | 0.1841 | 1.69 |      |
| 90  |                                                       | 313.00 | 101.325 | 191.19 | 0.1810 | 0.1832 | 1.22 |      |
| 91  |                                                       | 323.00 | 101.325 | 191.19 | 0.1790 | 0.1825 | 1.97 |      |
| 92  |                                                       | 333.00 | 101.325 | 191.19 | 0.1790 | 0.1820 | 1.65 |      |
| 93  |                                                       | 343.00 | 101.325 | 191.19 | 0.1780 | 0.1815 | 1.98 |      |
| 94  |                                                       | 353.00 | 101.325 | 191.19 | 0.1770 | 0.1812 | 2.36 |      |
| 95  | 1-butyl-3-methylimidazolium trifluoromethanesulfonate | 293.00 | 101.325 | 215.13 | 0.1470 | 0.1445 | 1.70 | [20] |
| 96  |                                                       | 303.00 | 101.325 | 215.13 | 0.1460 | 0.1435 | 1.75 |      |
| 97  |                                                       | 313.00 | 101.325 | 215.13 | 0.1450 | 0.1425 | 1.70 |      |
| 98  |                                                       | 323.00 | 101.325 | 215.13 | 0.1440 | 0.1418 | 1.55 |      |
| 99  |                                                       | 333.00 | 101.325 | 215.13 | 0.1440 | 0.1411 | 2.01 |      |
| 100 |                                                       | 343.00 | 101.325 | 215.13 | 0.1430 | 0.1406 | 1.71 |      |
| 101 |                                                       | 353.00 | 101.325 | 215.13 | 0.1420 | 0.1401 | 1.35 |      |
| 102 | 1-butyl-3-methylimidazolium trifluoromethanesulfonate | 293.00 | 101.325 | 215.13 | 0.1420 | 0.1445 | 1.76 | [21] |
| 103 |                                                       | 303.00 | 101.325 | 215.13 | 0.1410 | 0.1435 | 1.74 |      |
| 104 |                                                       | 313.00 | 101.325 | 215.13 | 0.1400 | 0.1425 | 1.81 |      |
| 105 |                                                       | 323.00 | 101.325 | 215.13 | 0.1390 | 0.1418 | 1.99 |      |
| 106 |                                                       | 333.00 | 101.325 | 215.13 | 0.1390 | 0.1411 | 1.52 |      |
| 107 |                                                       | 343.00 | 101.325 | 215.13 | 0.1380 | 0.1406 | 1.85 |      |

|     |                                                                          |        |           |        |        |        |      |      |
|-----|--------------------------------------------------------------------------|--------|-----------|--------|--------|--------|------|------|
| 108 |                                                                          | 353.00 | 101.325   | 215.13 | 0.1380 | 0.1401 | 1.51 |      |
| 109 | 1-octyl-3-methylimidazolium bis[(trifluoromethyl)sulfonyl]imide          | 293.00 | 101.325   | 346.21 | 0.1280 | 0.1278 | 0.16 | [20] |
| 110 |                                                                          | 303.00 | 101.325   | 346.21 | 0.1280 | 0.1274 | 0.50 |      |
| 111 |                                                                          | 313.00 | 101.325   | 346.21 | 0.1280 | 0.1270 | 0.81 |      |
| 112 |                                                                          | 323.00 | 101.325   | 346.21 | 0.1260 | 0.1266 | 0.49 |      |
| 113 |                                                                          | 333.00 | 101.325   | 346.21 | 0.1260 | 0.1263 | 0.24 |      |
| 114 |                                                                          | 343.00 | 101.325   | 346.21 | 0.1250 | 0.1260 | 0.82 |      |
| 115 |                                                                          | 353.00 | 101.325   | 346.21 | 0.1260 | 0.1258 | 0.19 |      |
| 116 | 1-butyl-3-methylimidazolium bis[(trifluoromethyl)sulfonyl]imide          | 293.00 | 101.325   | 346.21 | 0.1280 | 0.1231 | 3.85 | [20] |
| 117 |                                                                          | 303.00 | 101.325   | 346.21 | 0.1270 | 0.1230 | 3.19 |      |
| 118 |                                                                          | 313.00 | 101.325   | 346.21 | 0.1270 | 0.1229 | 3.25 |      |
| 119 |                                                                          | 323.00 | 101.325   | 346.21 | 0.1260 | 0.1228 | 2.53 |      |
| 120 |                                                                          | 333.00 | 101.325   | 346.21 | 0.1250 | 0.1228 | 1.78 |      |
| 121 |                                                                          | 343.00 | 101.325   | 346.21 | 0.1240 | 0.1227 | 1.02 |      |
| 122 |                                                                          | 353.00 | 101.325   | 346.21 | 0.1240 | 0.1227 | 1.02 |      |
| 123 | 1-butyl-3-methylimidazolium hexafluorophosphate                          | 293.00 | 101.325   | 211.03 | 0.1450 | 0.1453 | 0.21 | [21] |
| 124 |                                                                          | 303.00 | 101.325   | 211.03 | 0.1450 | 0.1449 | 0.06 |      |
| 125 |                                                                          | 313.00 | 101.325   | 211.03 | 0.1450 | 0.1445 | 0.34 |      |
| 126 |                                                                          | 323.00 | 101.325   | 211.03 | 0.1440 | 0.1440 | 0.03 |      |
| 127 |                                                                          | 333.00 | 101.325   | 211.03 | 0.1430 | 0.1435 | 0.34 |      |
| 128 |                                                                          | 343.00 | 101.325   | 211.03 | 0.1430 | 0.1428 | 0.14 |      |
| 129 |                                                                          | 353.00 | 101.325   | 211.03 | 0.1430 | 0.1420 | 0.70 |      |
| 130 | 1-butyl-3-methylimidazolium hexafluorophosphate                          | 294.90 | 100.000   | 211.03 | 0.1450 | 0.1452 | 0.15 | [5]  |
| 131 |                                                                          | 294.90 | 10000.000 | 211.03 | 0.1460 | 0.1470 | 0.71 |      |
| 132 |                                                                          | 294.90 | 20000.000 | 211.03 | 0.1480 | 0.1474 | 0.43 |      |
| 133 |                                                                          | 315.00 | 100.000   | 211.03 | 0.1450 | 0.1444 | 0.40 |      |
| 134 |                                                                          | 315.00 | 10000.000 | 211.03 | 0.1460 | 0.1467 | 0.48 |      |
| 135 |                                                                          | 315.00 | 20000.000 | 211.03 | 0.1470 | 0.1467 | 0.22 |      |
| 136 |                                                                          | 335.10 | 100.000   | 211.03 | 0.1440 | 0.1433 | 0.46 |      |
| 137 |                                                                          | 335.10 | 10000.000 | 211.03 | 0.1450 | 0.1466 | 1.11 |      |
| 138 |                                                                          | 335.10 | 20000.000 | 211.03 | 0.1470 | 0.1466 | 0.31 |      |
| 139 | triethyl(tetradecyl)phosphonium tris(pentafluoroethyl)trifluorophosphate | 282.19 | 101.325   | 475.99 | 0.1260 | 0.1262 | 0.17 | [18] |
| 140 |                                                                          | 292.99 | 101.325   | 475.99 | 0.1250 | 0.1252 | 0.18 |      |
| 141 |                                                                          | 298.41 | 101.325   | 475.99 | 0.1250 | 0.1248 | 0.18 |      |
| 142 |                                                                          | 303.54 | 101.325   | 475.99 | 0.1250 | 0.1244 | 0.48 |      |
| 143 |                                                                          | 314.37 | 101.325   | 475.99 | 0.1230 | 0.1237 | 0.56 |      |
| 144 |                                                                          | 325.65 | 101.325   | 475.99 | 0.1230 | 0.1231 | 0.06 |      |

|     |                                                                     |        |         |        |        |        |      |      |
|-----|---------------------------------------------------------------------|--------|---------|--------|--------|--------|------|------|
| 145 |                                                                     | 334.58 | 101.325 | 475.99 | 0.1230 | 0.1226 | 0.30 |      |
| 146 |                                                                     | 344.18 | 101.325 | 475.99 | 0.1230 | 0.1222 | 0.64 |      |
| 147 |                                                                     | 355.07 | 101.325 | 475.99 | 0.1210 | 0.1218 | 0.64 |      |
| 148 | trihexyltetradecylphosphonium bis(2,4,4-trimethylpentyl)phosphinate | 282.47 | 101.325 | 320.40 | 0.1370 | 0.1373 | 0.20 | [18] |
| 149 |                                                                     | 292.94 | 101.325 | 320.40 | 0.1360 | 0.1358 | 0.15 |      |
| 150 |                                                                     | 298.04 | 101.325 | 320.40 | 0.1350 | 0.1351 | 0.07 |      |
| 151 |                                                                     | 303.15 | 101.325 | 320.40 | 0.1350 | 0.1344 | 0.44 |      |
| 152 |                                                                     | 313.45 | 101.325 | 320.40 | 0.1330 | 0.1332 | 0.13 |      |
| 153 |                                                                     | 323.45 | 101.325 | 320.40 | 0.1320 | 0.1322 | 0.13 |      |
| 154 |                                                                     | 333.55 | 101.325 | 320.40 | 0.1310 | 0.1314 | 0.31 |      |
| 155 |                                                                     | 343.59 | 101.325 | 320.40 | 0.1310 | 0.1309 | 0.05 |      |
| 156 |                                                                     | 353.62 | 101.325 | 320.40 | 0.1310 | 0.1308 | 0.18 |      |
| 157 | 1-ethyl-3-methylimidazolium octyl sulfate                           | 273.15 | 101.325 | 275.35 | 0.1712 | 0.1718 | 0.33 | [6]  |
| 158 |                                                                     | 283.15 | 101.325 | 275.35 | 0.1711 | 0.1699 | 0.68 |      |
| 159 |                                                                     | 293.15 | 101.325 | 275.35 | 0.1670 | 0.1682 | 0.71 |      |
| 160 |                                                                     | 303.15 | 101.325 | 275.35 | 0.1679 | 0.1665 | 0.81 |      |
| 161 |                                                                     | 313.15 | 101.325 | 275.35 | 0.1648 | 0.1651 | 0.18 |      |
| 162 |                                                                     | 323.15 | 101.325 | 275.35 | 0.1629 | 0.1639 | 0.60 |      |
| 163 |                                                                     | 333.15 | 101.325 | 275.35 | 0.1631 | 0.1630 | 0.09 |      |
| 164 |                                                                     | 343.15 | 101.325 | 275.35 | 0.1626 | 0.1623 | 0.16 |      |
| 165 |                                                                     | 353.15 | 101.325 | 275.35 | 0.1621 | 0.1621 | 0.03 |      |
| 166 | 1-ethyl-3-methyl-1H-imidazolium hydrogen methylphosphonate          | 273.15 | 101.325 | 161.08 | 0.1941 | 0.1945 | 0.18 | [6]  |
| 167 |                                                                     | 283.15 | 101.325 | 161.08 | 0.1948 | 0.1939 | 0.46 |      |
| 168 |                                                                     | 293.15 | 101.325 | 161.08 | 0.1914 | 0.1934 | 1.03 |      |
| 169 |                                                                     | 303.15 | 101.325 | 161.08 | 0.1959 | 0.1928 | 1.56 |      |
| 170 |                                                                     | 313.15 | 101.325 | 161.08 | 0.1915 | 0.1923 | 0.43 |      |
| 171 |                                                                     | 323.15 | 101.325 | 161.08 | 0.1906 | 0.1918 | 0.63 |      |
| 172 |                                                                     | 333.15 | 101.325 | 161.08 | 0.1908 | 0.1913 | 0.25 |      |
| 173 |                                                                     | 343.15 | 101.325 | 161.08 | 0.1917 | 0.1908 | 0.49 |      |
| 174 |                                                                     | 353.15 | 101.325 | 161.08 | 0.1902 | 0.1903 | 0.04 |      |
| 175 | 1-ethyl-3-methyl-1H-imidazolium tricyanomethanide                   | 273.15 | 101.325 | 156.13 | 0.1956 | 0.1959 | 0.17 | [6]  |
| 176 |                                                                     | 283.15 | 101.325 | 156.13 | 0.1957 | 0.1948 | 0.45 |      |
| 177 |                                                                     | 293.15 | 101.325 | 156.13 | 0.1930 | 0.1935 | 0.24 |      |
| 178 |                                                                     | 303.15 | 101.325 | 156.13 | 0.1918 | 0.1919 | 0.03 |      |
| 179 |                                                                     | 313.15 | 101.325 | 156.13 | 0.1900 | 0.1901 | 0.03 |      |
| 180 |                                                                     | 323.15 | 101.325 | 156.13 | 0.1873 | 0.1881 | 0.43 |      |
| 181 |                                                                     | 333.15 | 101.325 | 156.13 | 0.1868 | 0.1861 | 0.39 |      |

|     |                                                            |        |         |        |        |        |      |      |
|-----|------------------------------------------------------------|--------|---------|--------|--------|--------|------|------|
| 182 |                                                            | 343.15 | 101.325 | 156.13 | 0.1847 | 0.1840 | 0.36 |      |
| 183 |                                                            | 353.15 | 101.325 | 156.13 | 0.1815 | 0.1821 | 0.31 |      |
| 184 | methyltrioctylammonium bis[(trifluoromethyl)sulfonyl]imide | 273.15 | 101.325 | 294.16 | 0.1314 | 0.1316 | 0.17 | [6]  |
| 185 |                                                            | 283.15 | 101.325 | 294.16 | 0.1291 | 0.1300 | 0.70 |      |
| 186 |                                                            | 293.15 | 101.325 | 294.16 | 0.1299 | 0.1286 | 0.98 |      |
| 187 |                                                            | 303.15 | 101.325 | 294.16 | 0.1283 | 0.1275 | 0.66 |      |
| 188 |                                                            | 313.15 | 101.325 | 294.16 | 0.1266 | 0.1265 | 0.09 |      |
| 189 |                                                            | 323.15 | 101.325 | 294.16 | 0.1247 | 0.1257 | 0.78 |      |
| 190 |                                                            | 333.15 | 101.325 | 294.16 | 0.1244 | 0.1250 | 0.49 |      |
| 191 |                                                            | 343.15 | 101.325 | 294.16 | 0.1242 | 0.1245 | 0.22 |      |
| 192 |                                                            | 353.15 | 101.325 | 294.16 | 0.1248 | 0.1240 | 0.62 |      |
| 193 | N,N-dibutyl-N-methyl-1-butanaminium L-threoninate          | 298.15 | 101.325 | 132.12 | 0.1600 | 0.1598 | 0.16 | [19] |
| 194 |                                                            | 303.15 | 101.325 | 132.12 | 0.1590 | 0.1592 | 0.12 |      |
| 195 |                                                            | 313.15 | 101.325 | 132.12 | 0.1580 | 0.1581 | 0.08 |      |
| 196 |                                                            | 323.15 | 101.325 | 132.12 | 0.1570 | 0.1571 | 0.04 |      |
| 197 |                                                            | 333.15 | 101.325 | 132.12 | 0.1560 | 0.1560 | 0.02 |      |
| 198 |                                                            | 343.15 | 101.325 | 132.12 | 0.1550 | 0.1550 | 0.02 |      |
| 199 |                                                            | 353.15 | 101.325 | 132.12 | 0.1540 | 0.1539 | 0.07 |      |
| 200 | N,N-dibutyl-N-methyl-1-butanaminium L-lysinate             | 298.15 | 101.325 | 159.19 | 0.1710 | 0.1709 | 0.05 | [19] |
| 201 |                                                            | 303.15 | 101.325 | 159.19 | 0.1700 | 0.1702 | 0.13 |      |
| 202 |                                                            | 313.15 | 101.325 | 159.19 | 0.1690 | 0.1690 | 0.02 |      |
| 203 |                                                            | 323.15 | 101.325 | 159.19 | 0.1680 | 0.1678 | 0.10 |      |
| 204 |                                                            | 333.15 | 101.325 | 159.19 | 0.1670 | 0.1669 | 0.08 |      |
| 205 |                                                            | 343.15 | 101.325 | 159.19 | 0.1660 | 0.1660 | 0.01 |      |
| 206 |                                                            | 353.15 | 101.325 | 159.19 | 0.1650 | 0.1652 | 0.11 |      |
| 207 | N,N-dibutyl-N-methylbutanaminium L-serinate                | 298.15 | 101.325 | 118.09 | 0.1690 | 0.1689 | 0.04 | [19] |
| 208 |                                                            | 303.15 | 101.325 | 118.09 | 0.1680 | 0.1682 | 0.14 |      |
| 209 |                                                            | 313.15 | 101.325 | 118.09 | 0.1670 | 0.1670 | 0.02 |      |
| 210 |                                                            | 323.15 | 101.325 | 118.09 | 0.1660 | 0.1659 | 0.09 |      |
| 211 |                                                            | 333.15 | 101.325 | 118.09 | 0.1650 | 0.1649 | 0.08 |      |
| 212 |                                                            | 343.15 | 101.325 | 118.09 | 0.1640 | 0.1640 | 0.01 |      |
| 213 |                                                            | 353.15 | 101.325 | 118.09 | 0.1630 | 0.1632 | 0.10 |      |
| 214 | tetrabutylphosphonium L-cysteinate                         | 298.15 | 101.325 | 151.13 | 0.1520 | 0.1518 | 0.11 | [19] |
| 215 |                                                            | 303.15 | 101.325 | 151.13 | 0.1510 | 0.1512 | 0.14 |      |
| 216 |                                                            | 313.15 | 101.325 | 151.13 | 0.1500 | 0.1500 | 0.02 |      |
| 217 |                                                            | 323.15 | 101.325 | 151.13 | 0.1490 | 0.1489 | 0.04 |      |
| 218 |                                                            | 333.15 | 101.325 | 151.13 | 0.1480 | 0.1479 | 0.05 |      |

|     |                                                                        |        |           |        |        |        |      |      |
|-----|------------------------------------------------------------------------|--------|-----------|--------|--------|--------|------|------|
| 219 |                                                                        | 343.15 | 101.325   | 151.13 | 0.1470 | 0.1470 | 0.01 |      |
| 220 |                                                                        | 353.15 | 101.325   | 151.13 | 0.1460 | 0.1461 | 0.05 |      |
| 221 | tetrabutylphosphonium L-threoninate                                    | 298.15 | 101.325   | 149.09 | 0.1560 | 0.1556 | 0.27 | [19] |
| 222 |                                                                        | 303.15 | 101.325   | 149.09 | 0.1550 | 0.1551 | 0.06 |      |
| 223 |                                                                        | 313.15 | 101.325   | 149.09 | 0.1540 | 0.1542 | 0.12 |      |
| 224 |                                                                        | 323.15 | 101.325   | 149.09 | 0.1530 | 0.1533 | 0.20 |      |
| 225 |                                                                        | 333.15 | 101.325   | 149.09 | 0.1520 | 0.1524 | 0.29 |      |
| 226 |                                                                        | 343.15 | 101.325   | 149.09 | 0.1520 | 0.1516 | 0.26 |      |
| 227 |                                                                        | 353.15 | 101.325   | 149.09 | 0.1510 | 0.1508 | 0.13 |      |
| 228 | tetrabutylphosphonium L-lysinate                                       | 298.15 | 101.325   | 176.16 | 0.1630 | 0.1634 | 0.26 | [19] |
| 229 |                                                                        | 303.15 | 101.325   | 176.16 | 0.1630 | 0.1628 | 0.10 |      |
| 230 |                                                                        | 313.15 | 101.325   | 176.16 | 0.1620 | 0.1618 | 0.15 |      |
| 231 |                                                                        | 323.15 | 101.325   | 176.16 | 0.1610 | 0.1608 | 0.14 |      |
| 232 |                                                                        | 333.15 | 101.325   | 176.16 | 0.1600 | 0.1599 | 0.08 |      |
| 233 |                                                                        | 343.15 | 101.325   | 176.16 | 0.1590 | 0.1591 | 0.03 |      |
| 234 |                                                                        | 353.15 | 101.325   | 176.16 | 0.1580 | 0.1583 | 0.17 |      |
| 235 | 1-butyl-1-methylpyrrolidinium tris(pentafluoroethyl)trifluorophosphate | 293.00 | 101.325   | 515.13 | 0.1070 | 0.1067 | 0.33 | [20] |
| 236 |                                                                        | 303.00 | 101.325   | 515.13 | 0.1060 | 0.1062 | 0.15 |      |
| 237 |                                                                        | 313.00 | 101.325   | 515.13 | 0.1060 | 0.1058 | 0.22 |      |
| 238 |                                                                        | 323.00 | 101.325   | 515.13 | 0.1050 | 0.1055 | 0.43 |      |
| 239 |                                                                        | 333.00 | 101.325   | 515.13 | 0.1050 | 0.1052 | 0.18 |      |
| 240 |                                                                        | 343.00 | 101.325   | 515.13 | 0.1050 | 0.1050 | 0.03 |      |
| 241 |                                                                        | 353.00 | 101.325   | 515.13 | 0.1050 | 0.1048 | 0.20 |      |
| 242 | trihexyl(tetradecyl)phosphonium chloride                               | 293.00 | 101.325   | 66.43  | 0.1610 | 0.1611 | 0.07 | [20] |
| 243 |                                                                        | 303.00 | 101.325   | 66.43  | 0.1600 | 0.1598 | 0.10 |      |
| 244 |                                                                        | 313.00 | 101.325   | 66.43  | 0.1590 | 0.1587 | 0.19 |      |
| 245 |                                                                        | 323.00 | 101.325   | 66.43  | 0.1570 | 0.1577 | 0.43 |      |
| 246 |                                                                        | 333.00 | 101.325   | 66.43  | 0.1570 | 0.1567 | 0.17 |      |
| 247 |                                                                        | 343.00 | 101.325   | 66.43  | 0.1560 | 0.1559 | 0.08 |      |
| 248 |                                                                        | 353.00 | 101.325   | 66.43  | 0.1550 | 0.1551 | 0.05 |      |
| 249 | 1-octyl-3-methylimidazolium hexafluorophosphate                        | 295.10 | 100.000   | 211.03 | 0.1450 | 0.1454 | 0.24 | [5]  |
| 250 |                                                                        | 295.10 | 10000.000 | 211.03 | 0.1470 | 0.1473 | 0.18 |      |
| 251 |                                                                        | 295.10 | 20000.000 | 211.03 | 0.1470 | 0.1486 | 1.09 |      |
| 252 |                                                                        | 315.10 | 100.000   | 211.03 | 0.1450 | 0.1440 | 0.71 |      |
| 253 |                                                                        | 315.10 | 10000.000 | 211.03 | 0.1460 | 0.1464 | 0.27 |      |
| 254 |                                                                        | 315.10 | 20000.000 | 211.03 | 0.1470 | 0.1477 | 0.46 |      |
| 255 |                                                                        | 335.20 | 100.000   | 211.03 | 0.1440 | 0.1423 | 1.19 |      |

|     |                                               |        |           |        |        |        |      |      |
|-----|-----------------------------------------------|--------|-----------|--------|--------|--------|------|------|
| 256 |                                               | 335.20 | 10000.000 | 211.03 | 0.1460 | 0.1457 | 0.23 |      |
| 257 |                                               | 335.20 | 20000.000 | 211.03 | 0.1470 | 0.1471 | 0.05 |      |
| 258 | 1-hexyl-3-methylimidazolium tetrafluoroborate | 293.00 | 101.325   | 152.87 | 0.1580 | 0.1607 | 1.71 | [21] |
| 259 |                                               | 303.00 | 101.325   | 152.87 | 0.1570 | 0.1599 | 1.83 |      |
| 260 |                                               | 313.00 | 101.325   | 152.87 | 0.1560 | 0.1589 | 1.88 |      |
| 261 |                                               | 323.00 | 101.325   | 152.87 | 0.1550 | 0.1579 | 1.87 |      |
| 262 |                                               | 333.00 | 101.325   | 152.87 | 0.1530 | 0.1567 | 2.44 |      |
| 263 |                                               | 343.00 | 101.325   | 152.87 | 0.1520 | 0.1555 | 2.30 |      |
| 264 |                                               | 353.00 | 101.325   | 152.87 | 0.1510 | 0.1542 | 2.14 |      |
| 265 | 1-hexyl-3-methylimidazolium tetrafluoroborate | 294.20 | 100.000   | 152.87 | 0.1660 | 0.1606 | 3.25 | [23] |
| 266 |                                               | 294.20 | 10000.000 | 152.87 | 0.1680 | 0.1664 | 0.97 |      |
| 267 |                                               | 294.20 | 20000.000 | 152.87 | 0.1700 | 0.1702 | 0.12 |      |
| 268 |                                               | 314.30 | 100.000   | 152.87 | 0.1650 | 0.1588 | 3.75 |      |
| 269 |                                               | 314.30 | 10000.000 | 152.87 | 0.1680 | 0.1660 | 1.21 |      |
| 270 |                                               | 314.30 | 20000.000 | 152.87 | 0.1690 | 0.1701 | 0.65 |      |
| 271 |                                               | 334.40 | 100.000   | 152.87 | 0.1640 | 0.1566 | 4.53 |      |
| 272 |                                               | 334.40 | 10000.000 | 152.87 | 0.1670 | 0.1655 | 0.91 |      |
| 273 |                                               | 334.40 | 20000.000 | 152.87 | 0.1690 | 0.1704 | 0.80 |      |
| 274 | 1-butylpyridinium tetrafluoroborate           | 294.20 | 100.000   | 164.90 | 0.1710 | 0.1706 | 0.25 | [22] |
| 275 |                                               | 294.20 | 10000.000 | 164.90 | 0.1710 | 0.1719 | 0.50 |      |
| 276 |                                               | 294.20 | 20000.000 | 164.90 | 0.1730 | 0.1730 | 0.01 |      |
| 277 |                                               | 314.30 | 100.000   | 164.90 | 0.1700 | 0.1699 | 0.08 |      |
| 278 |                                               | 314.30 | 10000.000 | 164.90 | 0.1710 | 0.1713 | 0.18 |      |
| 279 |                                               | 314.30 | 20000.000 | 164.90 | 0.1730 | 0.1726 | 0.21 |      |
| 280 |                                               | 334.30 | 100.000   | 164.90 | 0.1690 | 0.1690 | 0.03 |      |
| 281 |                                               | 334.30 | 10000.000 | 164.90 | 0.1710 | 0.1706 | 0.23 |      |
| 282 |                                               | 334.30 | 20000.000 | 164.90 | 0.1720 | 0.1721 | 0.06 |      |
| 283 | 1-methyl-3-octylimidazolium tetrafluoroborate | 294.20 | 100.000   | 152.87 | 0.1640 | 0.1643 | 0.18 | [23] |
| 284 |                                               | 294.20 | 10000.000 | 152.87 | 0.1650 | 0.1665 | 0.93 |      |
| 285 |                                               | 294.20 | 20000.000 | 152.87 | 0.1670 | 0.1665 | 0.32 |      |
| 286 |                                               | 314.30 | 100.000   | 152.87 | 0.1630 | 0.1616 | 0.84 |      |
| 287 |                                               | 314.30 | 10000.000 | 152.87 | 0.1640 | 0.1650 | 0.62 |      |
| 288 |                                               | 314.30 | 20000.000 | 152.87 | 0.1660 | 0.1651 | 0.55 |      |
| 289 |                                               | 334.40 | 100.000   | 152.87 | 0.1600 | 0.1584 | 1.01 |      |
| 290 |                                               | 334.40 | 10000.000 | 152.87 | 0.1620 | 0.1634 | 0.83 |      |
| 291 |                                               | 334.40 | 20000.000 | 152.87 | 0.1640 | 0.1640 | 0.03 |      |
| 292 | 1-hexylpyridinium tetrafluoroborate           | 294.20 | 100.000   | 164.90 | 0.1630 | 0.1634 | 0.24 | [22] |



|     |                                                                      |        |           |        |        |        |      |      |
|-----|----------------------------------------------------------------------|--------|-----------|--------|--------|--------|------|------|
| 293 |                                                                      | 294.20 | 10000.000 | 164.90 | 0.1650 | 0.1646 | 0.26 |      |
| 294 |                                                                      | 294.20 | 20000.000 | 164.90 | 0.1660 | 0.1656 | 0.23 |      |
| 295 |                                                                      | 314.30 | 100.000   | 164.90 | 0.1630 | 0.1621 | 0.55 |      |
| 296 |                                                                      | 314.30 | 10000.000 | 164.90 | 0.1630 | 0.1635 | 0.31 |      |
| 297 |                                                                      | 314.30 | 20000.000 | 164.90 | 0.1640 | 0.1647 | 0.45 |      |
| 298 |                                                                      | 334.30 | 100.000   | 164.90 | 0.1610 | 0.1605 | 0.29 |      |
| 299 |                                                                      | 334.30 | 10000.000 | 164.90 | 0.1620 | 0.1622 | 0.12 |      |
| 300 |                                                                      | 334.30 | 20000.000 | 164.90 | 0.1630 | 0.1637 | 0.40 |      |
|     | Prediction set                                                       |        |           |        |        |        |      |      |
| 301 | 1,2-dimethyl-3-propylimidazolium bis[(trifluoromethyl)sulfonyl]imide | 300.00 | 101.325   | 346.21 | 0.1300 | 0.1308 | 0.62 | [24] |
| 302 |                                                                      | 310.00 | 101.325   | 346.21 | 0.1300 | 0.1298 | 0.17 |      |
| 303 |                                                                      | 320.00 | 101.325   | 346.21 | 0.1290 | 0.1289 | 0.05 |      |
| 304 |                                                                      | 330.00 | 101.325   | 346.21 | 0.1290 | 0.1283 | 0.57 |      |
| 305 |                                                                      | 340.00 | 101.325   | 346.21 | 0.1280 | 0.1277 | 0.20 |      |
| 306 |                                                                      | 350.00 | 101.325   | 346.21 | 0.1280 | 0.1273 | 0.52 |      |
| 307 |                                                                      | 360.00 | 101.325   | 346.21 | 0.1270 | 0.1270 | 0.03 |      |
| 308 |                                                                      | 370.00 | 101.325   | 346.21 | 0.1270 | 0.1268 | 0.14 |      |
| 309 |                                                                      | 380.00 | 101.325   | 346.21 | 0.1260 | 0.1267 | 0.52 |      |
| 310 |                                                                      | 390.00 | 101.325   | 346.21 | 0.1260 | 0.1266 | 0.44 |      |
| 311 | trihexyl(tetradecyl)phosphonium bis[(trifluoromethyl)sulfonyl]imide  | 285.65 | 101.325   | 311.12 | 0.1390 | 0.1399 | 0.67 | [18] |
| 312 |                                                                      | 293.14 | 101.325   | 311.12 | 0.1380 | 0.1395 | 1.09 |      |
| 313 |                                                                      | 297.72 | 101.325   | 311.12 | 0.1370 | 0.1393 | 1.67 |      |
| 314 |                                                                      | 302.37 | 101.325   | 311.12 | 0.1370 | 0.1391 | 1.53 |      |
| 315 |                                                                      | 313.04 | 101.325   | 311.12 | 0.1350 | 0.1388 | 2.80 |      |
| 316 |                                                                      | 323.58 | 101.325   | 311.12 | 0.1340 | 0.1386 | 3.42 |      |
| 317 |                                                                      | 333.55 | 101.325   | 311.12 | 0.1350 | 0.1385 | 2.58 |      |
| 318 | trihexyl(tetradecyl)phosphonium bis[(trifluoromethyl)sulfonyl]imide  | 293.00 | 101.325   | 311.12 | 0.1440 | 0.1395 | 3.12 | [20] |
| 319 |                                                                      | 303.00 | 101.325   | 311.12 | 0.1430 | 0.1391 | 2.74 |      |
| 320 |                                                                      | 313.00 | 101.325   | 311.12 | 0.1420 | 0.1388 | 2.27 |      |
| 321 |                                                                      | 323.00 | 101.325   | 311.12 | 0.1410 | 0.1386 | 1.71 |      |
| 322 |                                                                      | 333.00 | 101.325   | 311.12 | 0.1410 | 0.1385 | 1.79 |      |
| 323 |                                                                      | 343.00 | 101.325   | 311.12 | 0.1400 | 0.1384 | 1.11 |      |
| 324 |                                                                      | 353.00 | 101.325   | 311.12 | 0.1390 | 0.1385 | 0.38 |      |
| 325 | N,N-dibutyl-N-methyl-1-butanaminium 2-aminoethanesulfonate           | 298.15 | 101.325   | 138.15 | 0.1610 | 0.1608 | 0.16 | [19] |
| 326 |                                                                      | 303.15 | 101.325   | 138.15 | 0.1600 | 0.1602 | 0.11 |      |
| 327 |                                                                      | 313.15 | 101.325   | 138.15 | 0.1590 | 0.1591 | 0.06 |      |
| 328 |                                                                      | 323.15 | 101.325   | 138.15 | 0.1580 | 0.1580 | 0.03 |      |

|     |                                                 |        |           |        |        |        |      |      |
|-----|-------------------------------------------------|--------|-----------|--------|--------|--------|------|------|
| 329 |                                                 | 333.15 | 101.325   | 138.15 | 0.1570 | 0.1570 | 0.01 |      |
| 330 |                                                 | 343.15 | 101.325   | 138.15 | 0.1560 | 0.1560 | 0.01 |      |
| 331 |                                                 | 353.15 | 101.325   | 138.15 | 0.1550 | 0.1549 | 0.04 |      |
| 332 | 1-octylpyridinium tetrafluoroborate             | 294.20 | 100.000   | 164.90 | 0.1600 | 0.1617 | 1.08 | [22] |
| 333 |                                                 | 294.20 | 10000.000 | 164.90 | 0.1630 | 0.1630 | 0.01 |      |
| 334 |                                                 | 294.20 | 20000.000 | 164.90 | 0.1650 | 0.1641 | 0.58 |      |
| 335 |                                                 | 314.30 | 100.000   | 164.90 | 0.1600 | 0.1598 | 0.11 |      |
| 336 |                                                 | 314.30 | 10000.000 | 164.90 | 0.1610 | 0.1614 | 0.24 |      |
| 337 |                                                 | 314.30 | 20000.000 | 164.90 | 0.1640 | 0.1627 | 0.79 |      |
| 338 |                                                 | 334.30 | 100.000   | 164.90 | 0.1580 | 0.1576 | 0.27 |      |
| 339 |                                                 | 334.30 | 10000.000 | 164.90 | 0.1590 | 0.1595 | 0.30 |      |
| 340 |                                                 | 334.30 | 20000.000 | 164.90 | 0.1610 | 0.1611 | 0.05 |      |
| 341 | 1-hexyl-3-methylimidazolium hexafluorophosphate | 293.00 | 101.325   | 211.03 | 0.1420 | 0.1430 | 0.72 | [21] |
| 342 |                                                 | 303.00 | 101.325   | 211.03 | 0.1410 | 0.1426 | 1.12 |      |
| 343 |                                                 | 313.00 | 101.325   | 211.03 | 0.1410 | 0.1421 | 0.79 |      |
| 344 |                                                 | 323.00 | 101.325   | 211.03 | 0.1390 | 0.1416 | 1.86 |      |
| 345 |                                                 | 333.00 | 101.325   | 211.03 | 0.1390 | 0.1410 | 1.41 |      |
| 346 |                                                 | 343.00 | 101.325   | 211.03 | 0.1380 | 0.1402 | 1.61 |      |
| 347 |                                                 | 353.00 | 101.325   | 211.03 | 0.1380 | 0.1394 | 0.98 |      |
| 348 | 1-hexyl-3-methylimidazolium hexafluorophosphate | 294.10 | 100.000   | 211.03 | 0.1450 | 0.1430 | 1.40 | [5]  |
| 349 |                                                 | 294.10 | 10000.000 | 211.03 | 0.1470 | 0.1457 | 0.92 |      |
| 350 |                                                 | 294.10 | 20000.000 | 211.03 | 0.1480 | 0.1477 | 0.19 |      |
| 351 |                                                 | 315.10 | 100.000   | 211.03 | 0.1450 | 0.1420 | 2.07 |      |
| 352 |                                                 | 315.10 | 10000.000 | 211.03 | 0.1460 | 0.1453 | 0.49 |      |
| 353 |                                                 | 315.10 | 20000.000 | 211.03 | 0.1480 | 0.1473 | 0.51 |      |
| 354 |                                                 | 335.20 | 100.000   | 211.03 | 0.1440 | 0.1408 | 2.22 |      |
| 355 |                                                 | 335.20 | 10000.000 | 211.03 | 0.1460 | 0.1452 | 0.58 |      |
| 356 |                                                 | 335.20 | 20000.000 | 211.03 | 0.1470 | 0.1473 | 0.18 |      |
| 357 | tetrabutylphosphonium L-serinate                | 298.15 | 101.325   | 135.06 | 0.1610 | 0.1609 | 0.09 | [19] |
| 358 |                                                 | 303.15 | 101.325   | 135.06 | 0.1600 | 0.1602 | 0.13 |      |
| 359 |                                                 | 313.15 | 101.325   | 135.06 | 0.1590 | 0.1590 | 0.01 |      |
| 360 |                                                 | 323.15 | 101.325   | 135.06 | 0.1580 | 0.1579 | 0.04 |      |
| 361 |                                                 | 333.15 | 101.325   | 135.06 | 0.1570 | 0.1569 | 0.05 |      |
| 362 |                                                 | 343.15 | 101.325   | 135.06 | 0.1560 | 0.1560 | 0.01 |      |
| 363 |                                                 | 353.15 | 101.325   | 135.06 | 0.1550 | 0.1551 | 0.06 |      |
| 364 | tetrabutylphosphonium 2-aminoethanesulfonate    | 298.15 | 101.325   | 155.12 | 0.1600 | 0.1604 | 0.23 | [19] |
| 365 |                                                 | 303.15 | 101.325   | 155.12 | 0.1600 | 0.1598 | 0.10 |      |

|     |                                                                   |        |         |        |        |        |      |      |
|-----|-------------------------------------------------------------------|--------|---------|--------|--------|--------|------|------|
| 366 |                                                                   | 313.15 | 101.325 | 155.12 | 0.1590 | 0.1588 | 0.11 |      |
| 367 |                                                                   | 323.15 | 101.325 | 155.12 | 0.1580 | 0.1579 | 0.09 |      |
| 368 |                                                                   | 333.15 | 101.325 | 155.12 | 0.1570 | 0.1569 | 0.04 |      |
| 369 |                                                                   | 343.15 | 101.325 | 155.12 | 0.1560 | 0.1560 | 0.02 |      |
| 370 |                                                                   | 353.15 | 101.325 | 155.12 | 0.1550 | 0.1552 | 0.10 |      |
| 371 | 1-decyl-3-methylimidazolium bis(trifluoromethylsulfonyl)amide     | 293.00 | 101.325 | 346.21 | 0.1470 | 0.1450 | 1.39 | [20] |
| 372 |                                                                   | 303.00 | 101.325 | 346.21 | 0.1460 | 0.1447 | 0.88 |      |
| 373 |                                                                   | 313.00 | 101.325 | 346.21 | 0.1450 | 0.1445 | 0.32 |      |
| 374 |                                                                   | 323.00 | 101.325 | 346.21 | 0.1440 | 0.1444 | 0.26 |      |
| 375 |                                                                   | 333.00 | 101.325 | 346.21 | 0.1440 | 0.1443 | 0.19 |      |
| 376 |                                                                   | 343.00 | 101.325 | 346.21 | 0.1430 | 0.1442 | 0.83 |      |
| 377 |                                                                   | 353.00 | 101.325 | 346.21 | 0.1420 | 0.1441 | 1.49 |      |
| 378 | 1-ethyl-3-methylimidazolium dicyanamide                           | 273.15 | 101.325 | 132.11 | 0.2053 | 0.2059 | 0.29 | [6]  |
| 379 |                                                                   | 283.15 | 101.325 | 132.11 | 0.2050 | 0.2044 | 0.32 |      |
| 380 |                                                                   | 293.15 | 101.325 | 132.11 | 0.2021 | 0.2026 | 0.26 |      |
| 381 |                                                                   | 303.15 | 101.325 | 132.11 | 0.2022 | 0.2007 | 0.73 |      |
| 382 |                                                                   | 313.15 | 101.325 | 132.11 | 0.1986 | 0.1988 | 0.08 |      |
| 383 |                                                                   | 323.15 | 101.325 | 132.11 | 0.1958 | 0.1967 | 0.48 |      |
| 384 |                                                                   | 333.15 | 101.325 | 132.11 | 0.1942 | 0.1948 | 0.30 |      |
| 385 |                                                                   | 343.15 | 101.325 | 132.11 | 0.1935 | 0.1930 | 0.28 |      |
| 386 |                                                                   | 353.15 | 101.325 | 132.11 | 0.1914 | 0.1913 | 0.06 |      |
| 387 | tetrabutylphosphonium L-valinate                                  | 313.15 | 101.325 | 147.12 | 0.1570 | 0.1570 | 0.02 | [19] |
| 388 |                                                                   | 323.15 | 101.325 | 147.12 | 0.1560 | 0.1560 | 0.01 |      |
| 389 |                                                                   | 333.15 | 101.325 | 147.12 | 0.1550 | 0.1550 | 0.01 |      |
| 390 |                                                                   | 343.15 | 101.325 | 147.12 | 0.1540 | 0.1540 | 0.01 |      |
| 391 |                                                                   | 353.15 | 101.325 | 147.12 | 0.1530 | 0.1530 | 0.01 |      |
| 392 | 1-butyl-1-methylpyrrolidinium bis[(trifluoromethyl)sulfonyl]imide | 293.00 | 101.325 | 350.27 | 0.1180 | 0.1222 | 3.53 | [21] |
| 393 |                                                                   | 303.00 | 101.325 | 350.27 | 0.1180 | 0.1212 | 2.72 |      |
| 394 |                                                                   | 313.00 | 101.325 | 350.27 | 0.1180 | 0.1204 | 2.03 |      |
| 395 |                                                                   | 323.00 | 101.325 | 350.27 | 0.1170 | 0.1197 | 2.30 |      |
| 396 |                                                                   | 333.00 | 101.325 | 350.27 | 0.1170 | 0.1191 | 1.79 |      |
| 397 | 1-butyl-1-methylpyrrolidinium bis[(trifluoromethyl)sulfonyl]imide | 293.00 | 101.325 | 350.27 | 0.1250 | 0.1222 | 2.27 | [20] |
| 398 |                                                                   | 303.00 | 101.325 | 350.27 | 0.1250 | 0.1212 | 3.03 |      |
| 399 |                                                                   | 313.00 | 101.325 | 350.27 | 0.1240 | 0.1204 | 2.91 |      |
| 400 |                                                                   | 323.00 | 101.325 | 350.27 | 0.1240 | 0.1197 | 3.48 |      |
